# Supplementary material for: Full spectrum fluorescence lifetime imaging with 0.5 nm spectral and 50 ps temporal resolution
Source: PubMed Central journal article supplement (PMC8595732; doi:10.1038/s41467-021-26837-0), 2021-11-16
Supplement: 41467_2021_26837_MOESM3_ESM.pdf [file 41467_2021_26837_MOESM3_ESM.pdf]

## **Description of Additional Supplementary Files**

File name: Supplementary Movie 1

Description: Full spectrum fluorescence lifetime imaging of *Convallaria Majalis*. The movie shows a walk-through of the datacube with a colour representation of the intensity data, the corresponding lifetime image, weighted by the intensity, and the corresponding lifetime histogram for each wavelength.

File name: Supplementary Movie 2

Description: Full spectrum fluorescence lifetime imaging of a honeybee wing. The movie shows a walk-through of the datacube with the lifetime image for each wavelength, weighted by the intensity, and the corresponding lifetime histogram.
